# Supplementary material
Source: PubMed Central journal article supplement (PMC4285688)
Supplement: NIHMS634029-supplement-1.pdf [file NIHMS634029-supplement-1.pdf]

## Appendix 1. Coding of All Adverse Maternal and Newborn Outcomes

| Adverse Outcome                               | Source | Variables                                                                                                           | Coding                          |
|-----------------------------------------------|--------|---------------------------------------------------------------------------------------------------------------------|---------------------------------|
| <b>Preeclampsia</b>                           |        |                                                                                                                     |                                 |
| Superimposed preeclampsia                     | ICD-10 | Pre-existing hypertensive disorder with superimposed proteinuria                                                    | O11.001-<br>O11.004,<br>O11.009 |
| Preeclampsia                                  | ICD-10 | Gestational (pregnancy-induced) hypertension without significant proteinuria (includes gHTN and mild pre-eclampsia) | O13.001-<br>O13.004,<br>O13.009 |
|                                               |        | Gestational (pregnancy-induced) hypertension with significant proteinuria                                           | O14.001-<br>O14.004,<br>O14.009 |
|                                               | ICD-10 | Unspecified maternal hypertension                                                                                   | O16.001-<br>O16.004,<br>O16.009 |
|                                               | ICD-10 | Eclampsia in pregnancy, labour, puerperium, unspecified time                                                        | O15.001-<br>O15.909             |
| <b>Gestational diabetes mellitus</b>          |        |                                                                                                                     |                                 |
| Gestational diabetes                          | ICD-10 | Diabetes mellitus arising in pregnancy (gestational)                                                                | O24.801-<br>O24.804,<br>O24.809 |
| Gestational diabetes                          | BCPDR  | Insulin-dependent or non-insulin dependent diabetes mellitus in pregnancy                                           |                                 |
| <b>Spontaneous preterm birth &lt;32 weeks</b> |        |                                                                                                                     |                                 |
| Gestational age <32 weeks                     | BCPDR  | Final estimate of gestational age per BCPDR algorithm                                                               |                                 |
| Induction of labor                            | BCPDR  | Labour initiation                                                                                                   | No                              |
| PROM                                          | ICD-10 | Premature rupture of membranes                                                                                      | O42.011-<br>O42.909             |
| <b>Indicated preterm birth &lt;37 weeks</b>   |        |                                                                                                                     |                                 |

Schummers L, Hutcheon JA, Bodnar LM, Lieberman E, Himes KP. Risk of adverse pregnancy outcomes by prepregnancy body mass index: a population-based study to inform prepregnancy weight loss counseling. *Obstet Gynecol* 2014;125.

The authors provided this information as a supplement to their article.

|                                                                         |        |                                                       |                           |
|-------------------------------------------------------------------------|--------|-------------------------------------------------------|---------------------------|
| Gestational age <37 weeks                                               | BCPDR  | Final estimate of gestational age per BCPDR algorithm |                           |
| Induction of labor                                                      | BCPDR  | Labour initiation                                     |                           |
| Mode of delivery                                                        | BCPDR  | Cesarean                                              |                           |
| Labor type                                                              | BCPDR  | No labor                                              |                           |
| <b>Macrosomia</b>                                                       |        |                                                       |                           |
| Birth weight >4500 grams                                                | BCPDR  |                                                       |                           |
| <b>Shoulder dystocia</b>                                                |        |                                                       |                           |
| Other obstructed labour                                                 | ICD-10 | Obstructed labour due to shoulder dystocia            | O66.001, O66.003,         |
|                                                                         |        | Includes: impacted shoulders                          | O66.009                   |
|                                                                         | ICD-10 | Obstructed labour due to unusually large fetus        | O66.201, O66.203, O66.209 |
|                                                                         | CCI    |                                                       | 5MD.46.LP                 |
| <b>Birth injuries</b>                                                   |        |                                                       |                           |
| Birth injury to peripheral nervous system                               | ICD-10 | Erb's paralysis due to birth injury                   | P14.0                     |
|                                                                         | ICD-10 | Klumpke's paralysis due to birth injury               | P14.1                     |
|                                                                         | ICD-10 | Other brachial plexus birth injuries                  | P14.3                     |
| Other interventions to deliver fetus                                    | CCI    | Fracture of humerus or clavicle                       | 5MD.45.QB, 5MD.45.QC      |
| <b>Cesarean delivery</b>                                                |        |                                                       |                           |
| Mode of delivery                                                        | BCPDR  |                                                       |                           |
| <b>Postpartum hemorrhage requiring intervention to control bleeding</b> |        |                                                       |                           |
| Blood transfusion given                                                 | BCPDR  |                                                       |                           |
| Postpartum hemorrhage                                                   | ICD-10 | Postpartum hemorrhage                                 | O72                       |
| Postpartum hemorrhage for atony (for sensitivity analysis)              | ICD-10 | Other immediate postpartum hemorrhage                 | O72.1                     |
| Hysterectomy                                                            | CCI    | Excision partial, uterus and surrounding              | 1.RM.87.LA-GX             |

Schummers L, Hutcheon JA, Bodnar LM, Lieberman E, Himes KP. Risk of adverse pregnancy outcomes by prepregnancy body mass index: a population-based study to inform prepregnancy weight loss counseling. *Obstet Gynecol* 2014;125.

The authors provided this information as a supplement to their article.

|                                                         |        |                                                                                                                                                    |                                                                    |
|---------------------------------------------------------|--------|----------------------------------------------------------------------------------------------------------------------------------------------------|--------------------------------------------------------------------|
|                                                         | CCI    | structures<br>Excision total, uterus and surrounding structures                                                                                    | 1.RM.89                                                            |
| Other Procedures to control hemorrhage                  | CCI    | Emobolization of vessels, ligation of vessels, dilation and curretage, aspiration and curettage, uterine (and vaginal) packing, suturing of uterus | (1.RM.13, 1.KT.51, 5.PC.91.GA, 5.PC.91.GC, 5.PC.91.HT, 5.PC.91.LA) |
| <b>Anesthesia complications</b>                         |        |                                                                                                                                                    |                                                                    |
| Complications of anaesthesia during labour and delivery | ICD-10 | Aspiration pneumonitis due to anaesthesia during labour and delivery                                                                               | O74.0                                                              |
|                                                         | ICD-10 | Other pulmonary complications of anaesthesia during labour and delivery                                                                            | O74.1                                                              |
|                                                         | ICD-10 | Cardiac complications of anaesthesia during labour and delivery                                                                                    | O74.2                                                              |
|                                                         | ICD-10 | Central nervous system complications of anaesthesia during labour and delivery                                                                     | O74.3                                                              |
|                                                         | ICD-10 | Failed or difficult intubation during labour and delivery                                                                                          | O74.7                                                              |
| <b>Maternal mortality/severe maternal morbidity</b>     |        |                                                                                                                                                    |                                                                    |
| Venous complications in pregnancy                       | ICD-10 | Cerebral venous thrombosis in pregnancy                                                                                                            | O22.5                                                              |
|                                                         | ICD-10 | Cerebral venous thrombosis in the peurperium                                                                                                       | O87.3                                                              |
| Premature separation of placenta                        | ICD-10 | Placental abruption with coagulation defect                                                                                                        | O45.0                                                              |
| Antepartum hemorrhage NEC                               | ICD-10 | Antepartum hemorrhage with coagulation defect                                                                                                      | O46                                                                |
| Other complications of labour and delivery NEC          | ICD-10 | Shock during or following labour and delivery                                                                                                      | O75.1, R57, T80.5, T88.6                                           |

Schummers L, Hutcheon JA, Bodnar LM, Lieberman E, Himes KP. Risk of adverse pregnancy outcomes by prepregnancy body mass index: a population-based study to inform prepregnancy weight loss counseling. *Obstet Gynecol* 2014;125.

The authors provided this information as a supplement to their article.

|                                                       |        |                                                                                                 |                                  |
|-------------------------------------------------------|--------|-------------------------------------------------------------------------------------------------|----------------------------------|
| Complications predominantly related to the puerperium | ICD-10 | Sepsis during labour                                                                            | O75.3                            |
|                                                       | ICD-10 | Puerperal sepsis                                                                                | O85                              |
| Complications of the puerperium NEC                   | ICD-10 | Obstetric embolism                                                                              | O88                              |
|                                                       | ICD-10 | Cardiomyopathy in the puerperium                                                                | O90.3, I42, I43                  |
|                                                       | ICD-10 | (Postpartum) acute renal failure                                                                | O90.4, N17, N19, N99.0           |
|                                                       | ICD-10 | Obstetric death of unspecified cause                                                            | O95                              |
|                                                       | ICD-10 | Death from any obstetric cause occurring > 42 days, but <1 year after delivery                  | O96                              |
|                                                       | ICD-10 | Death from sequelae of direct obstetric causes                                                  | O97                              |
|                                                       | ICD-10 | Sudden death, death from unspecified cause                                                      | R96-R99                          |
|                                                       | ICD-10 | Cardiac arrest, cardiac failure, myocardial infarction, or pulmonary edema                      | I21-I22, I46, I50, J81           |
|                                                       | ICD-10 | Cerebrovascular diseases: subarachnoid and intracranial hemorrhage, cerebral infarction, stroke | I50, J81, I60-I64                |
|                                                       | ICD-10 | Adult respiratory distress syndrome                                                             | J80                              |
|                                                       | CCI    | Repair of bladder, urethra, or intestine                                                        | 5.PC.80.JR, 1.NK.80^^, 1.NM.80^^ |

---

### Stillbirth

|            |       |                                                           |
|------------|-------|-----------------------------------------------------------|
| Stillbirth | BCPDR | Stillbirth, occurred antenatally, intrapartum, or unknown |
|------------|-------|-----------------------------------------------------------|

---

### NICU stay $\geq 48$ hours

|                                             |       |
|---------------------------------------------|-------|
| Neonatal Intensive Care Unit Level 2/3 days | BCPDR |
|---------------------------------------------|-------|

---

### In-hospital newborn mortality

|                            |       |
|----------------------------|-------|
| Baby discharged to 'death' | BCPDR |
|----------------------------|-------|

---

ICD-10: Canadian Institute for Health Information, 2009. International Statistical Classification of Diseases and Related

Schummers L, Hutcheon JA, Bodnar LM, Lieberman E, Himes KP. Risk of adverse pregnancy outcomes by prepregnancy body mass index: a population-based study to inform prepregnancy weight loss counseling. *Obstet Gynecol* 2014;125.

The authors provided this information as a supplement to their article.

---

Health Problems, Tenth Revision.

CCI: Canadian Institute for Health Information, 2009. Canadian Classification of Health Interventions

BCPDR: British Columbia Perinatal Data Registry

For a complete list of variables available in the BCPDR, please refer to the Data Access Request form found on the Perinatal Services BC website: <http://www.perinatalservicesbc.ca/NR/rdonlyres/4353788B-2344-4E0D-83EB-6B57FC0D8D64/0/DataAccessRequestForm.pdf>

---

Schummers L, Hutcheon JA, Bodnar LM, Lieberman E, Himes KP. Risk of adverse pregnancy outcomes by prepregnancy body mass index: a population-based study to inform prepregnancy weight loss counseling. *Obstet Gynecol* 2014;125.

The authors provided this information as a supplement to their article.

**Appendix 2. Comparing Characteristics of Pregnancies With Available Compared With Missing Body Mass Index Data (Prepregnancy Weight or Height)**

| <b>Characteristic</b>                  | <b>Available BMI<br/>Data<br/>(n=229,387)</b> | <b>Missing BMI<br/>Data<br/>(n=105,474)</b> | <b>P-</b> |
|----------------------------------------|-----------------------------------------------|---------------------------------------------|-----------|
| Maternal age                           | 30.1 ± 5.5                                    | 29.6±5.9                                    | <0.001    |
| Nulliparous                            | 112,619 (49.1)                                | 42,892 (40.7)                               | <0.001    |
| Smoking in pregnancy                   | 20,990 (9.2)                                  | 11,432 (10.8)                               | <0.001    |
| Gestational age                        | 38.7±2.0                                      | 38.6±2.3                                    | <0.001    |
| Birth weight                           | 3425±553                                      | 3393±597                                    | <0.001    |
| Induction of labor                     | 49,580 (21.7)                                 | 19,193 (18.3)                               | <0.001    |
| Preeclampsia                           | 11,288 (4.9)                                  | 4,717 (4.5)                                 | <0.001    |
| Gestational diabetes                   | 18,4234 (8.0)                                 | 7,142 (6.8)                                 | <0.001    |
| Spontaneous preterm delivery <32 weeks | 1,457 (0.6)                                   | 1,007 (1.0)                                 | <0.001    |
| Indicated preterm delivery <37 weeks   | 4,519 (2.0)                                   | 2,229 (2.1)                                 | 0.006     |
| Birth weight ≥4500 grams               | 4,508 (2.0)                                   | 2,121 (2.0)                                 | 0.378     |

Schummers L, Hutcheon JA, Bodnar LM, Lieberman E, Himes KP. Risk of adverse pregnancy outcomes by prepregnancy body mass index: a population-based study to inform prepregnancy weight loss counseling. *Obstet Gynecol* 2014;125.

The authors provided this information as a supplement to their article.

|                                              |               |               |        |
|----------------------------------------------|---------------|---------------|--------|
| Shoulder dystocia                            | 8,331 (3.6)   | 3,813 (3.6)   | 0.810  |
| Cesarean delivery                            | 67,969 (29.6) | 31,510 (29.9) | 0.151  |
| Postpartum hemorrhage requiring intervention | 1,663 (0.7)   | 837 (0.8)     | 0.032  |
| Maternal mortality/severe morbidity          | 1,385 (0.6)   | 685 (0.7)     | 0.117  |
| Stillbirth                                   | 700 (0.3)     | 778 (0.7)     | <0.001 |
| NICU stay $\geq$ 48 hours                    | 9,701 (4.2)   | 4,402 (4.2)   | 0.457  |
| In-hospital newborn mortality                | 965 (0.4)     | 1,039 (1.0)   | <0.001 |

---

Schummers L, Hutcheon JA, Bodnar LM, Lieberman E, Himes KP. Risk of adverse pregnancy outcomes by prepregnancy body mass index: a population-based study to inform prepregnancy weight loss counseling. *Obstet Gynecol* 2014;125.

The authors provided this information as a supplement to their article.
